# Supplementary material for: Discovery of tissue-specific exons using comprehensive human exon microarrays
Source: PubMed Central journal article supplement (PMC1896007; doi:10.1186/gb-2007-8-4-r64), 2007-04-24

# Additional File 1 - RT-PCR Results of Novel Tissue-Specific Exons

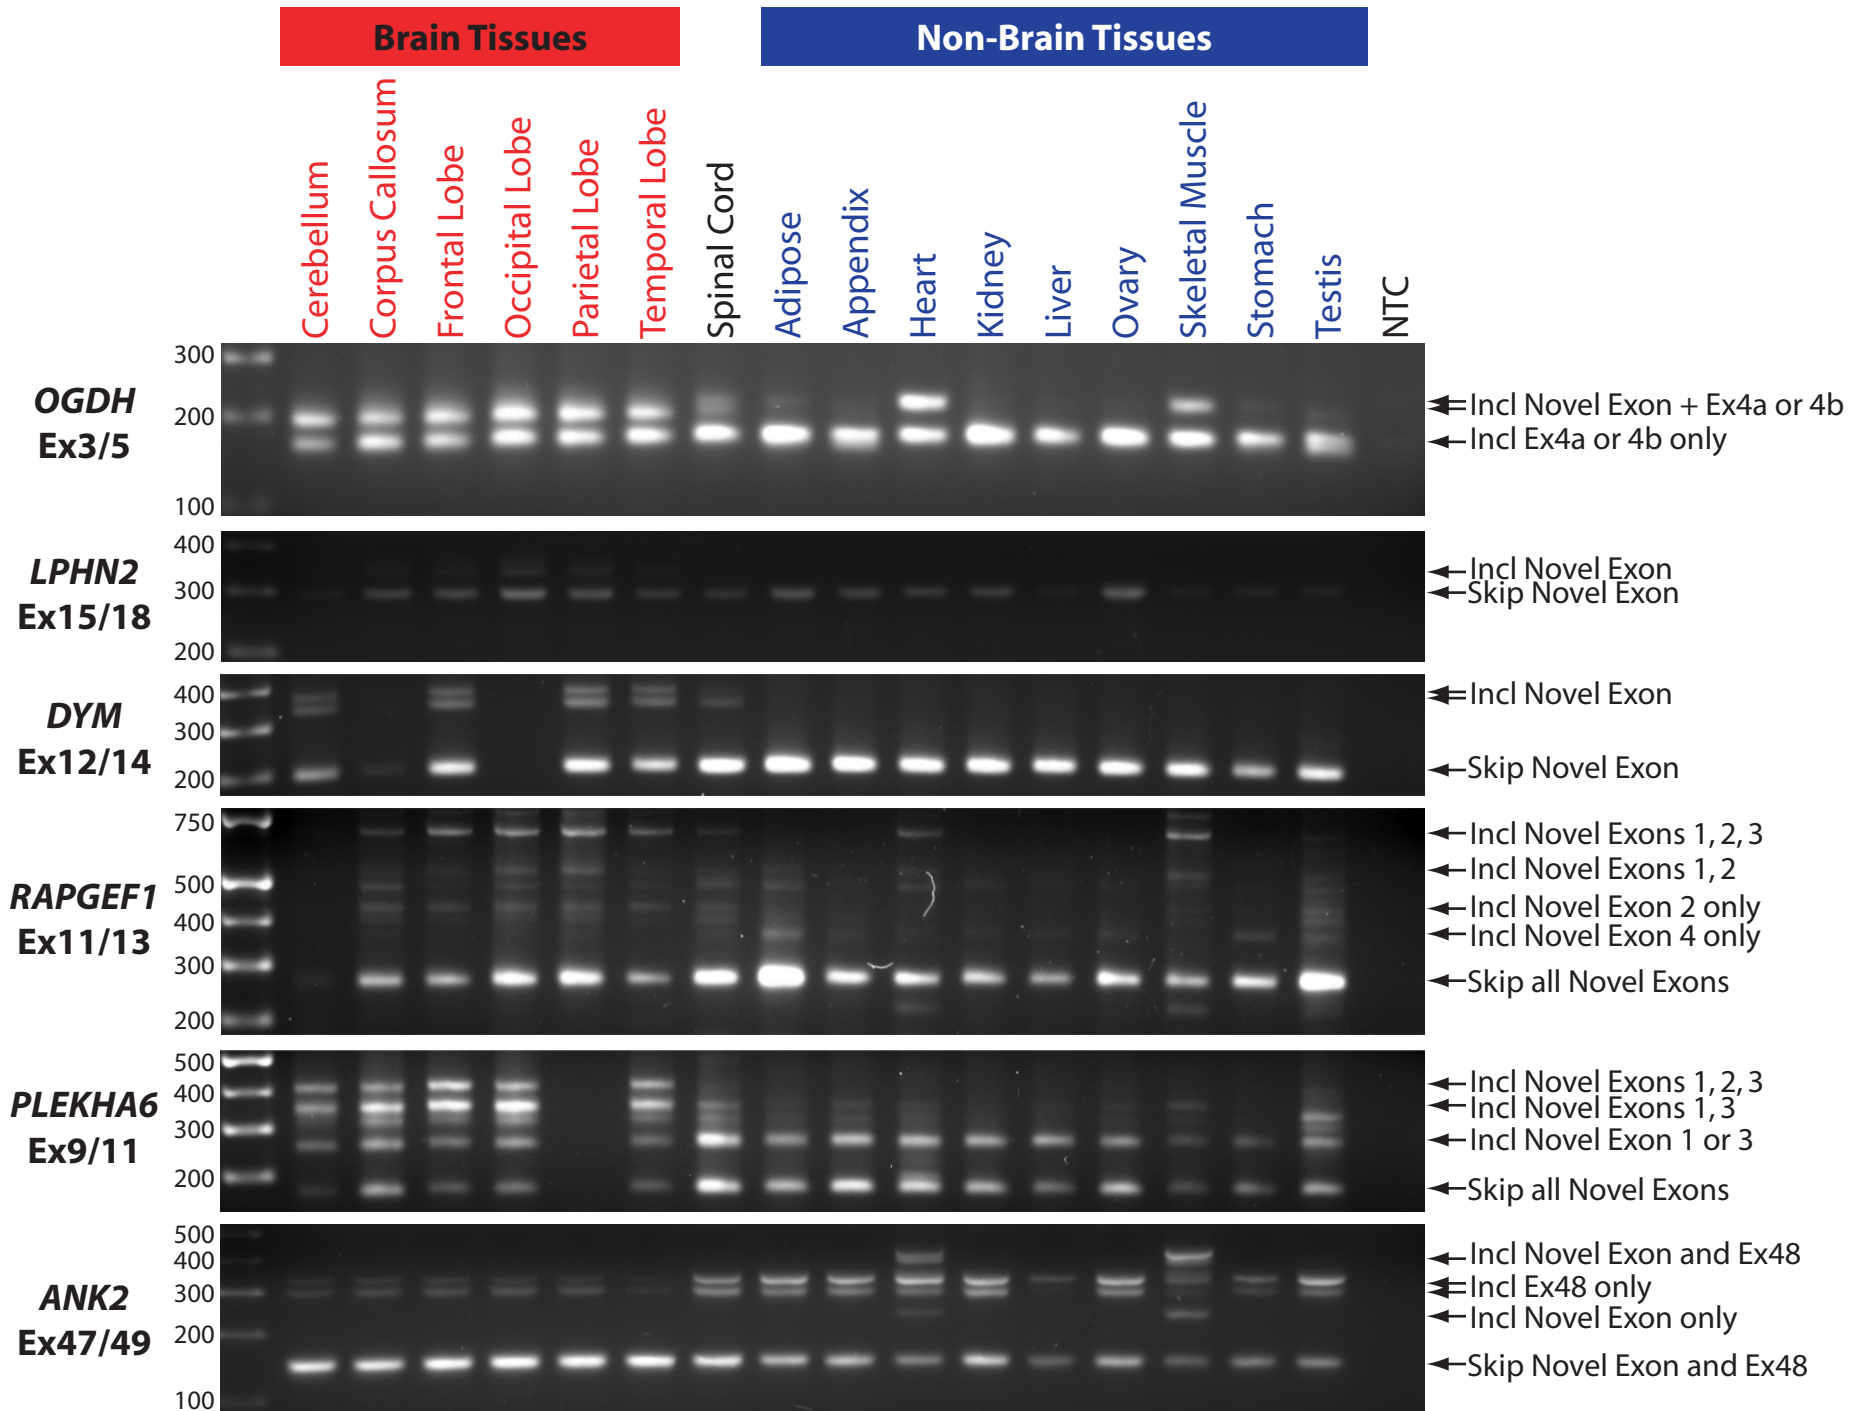

Supplement: gb-2007-8-4-r64-S1.pdf [file gb-2007-8-4-r64-S1.pdf]
