# Supplementary material for: Discovery of tissue-specific exons using comprehensive human exon microarrays
Source: PubMed Central journal article supplement (PMC1896007; doi:10.1186/gb-2007-8-4-r64), 2007-04-24
Supplement: gb-2007-8-4-r64-S2.pdf [file gb-2007-8-4-r64-S2.pdf]

# Additional File 2 - Pair-wise Tissue Splicing Index Results

A

| Comparison      | Corpus Callosum | Frontal Lobe | Occipital Lobe | Parietal Lobe | Temporal Lobe | Spinal Cord | Adipose | Appendix | Heart | Kidney | Liver | Ovary | Skeletal Muscle | Stomach | Testis |
|-----------------|-----------------|--------------|----------------|---------------|---------------|-------------|---------|----------|-------|--------|-------|-------|-----------------|---------|--------|
| Corpus Callosum | 1281            |              |                |               |               |             |         |          |       |        |       |       |                 |         |        |
| Frontal Lobe    | 1665            | 300          |                |               |               |             |         |          |       |        |       |       |                 |         |        |
| Occipital Lobe  | 2210            | 1413         | 1622           |               |               |             |         |          |       |        |       |       |                 |         |        |
| Parietal Lobe   | 2793            | 739          | 102            | 2459          |               |             |         |          |       |        |       |       |                 |         |        |
| Temporal Lobe   | 2358            | 392          | 246            | 1925          | 479           |             |         |          |       |        |       |       |                 |         |        |
| Spinal Cord     | 1365            | 280          | 598            | 1595          | 895           | 897         |         |          |       |        |       |       |                 |         |        |
| Adipose         | 903             | 945          | 1442           | 2211          | 2103          | 2025        | 744     |          |       |        |       |       |                 |         |        |
| Appendix        | 442             | 925          | 1413           | 1741          | 2063          | 1968        | 893     | 129      |       |        |       |       |                 |         |        |
| Heart           | 1122            | 610          | 852            | 516           | 1303          | 851         | 603     | 756      | 598   |        |       |       |                 |         |        |
| Kidney          | 1176            | 1240         | 1532           | 2485          | 2002          | 2040        | 979     | 587      | 338   | 779    |       |       |                 |         |        |
| Liver           | 2022            | 2065         | 2833           | 2952          | 4335          | 3864        | 1569    | 1808     | 1097  | 1303   | 2363  |       |                 |         |        |
| Ovary           | 2138            | 1957         | 2686           | 862           | 3913          | 3246        | 1596    | 2313     | 1419  | 397    | 2416  | 2315  |                 |         |        |
| Skeletal Muscle | 755             | 852          | 849            | 1274          | 1049          | 1034        | 575     | 353      | 512   | 390    | 478   | 1419  | 1449            |         |        |
| Stomach         | 1335            | 1123         | 1395           | 449           | 1937          | 1601        | 939     | 1322     | 899   | 167    | 1400  | 1328  | 223             | 731     |        |
| Testis          | 4209            | 4116         | 5042           | 2509          | 7247          | 6060        | 3563    | 4037     | 2932  | 1361   | 4235  | 4772  | 1767            | 2658    | 1048   |

B

| Comparison      | Corpus Callosum | Frontal Lobe | Occipital Lobe | Parietal Lobe | Temporal Lobe | Spinal Cord | Adipose | Appendix | Heart | Kidney | Liver | Ovary | Skeletal Muscle | Stomach | Testis |
|-----------------|-----------------|--------------|----------------|---------------|---------------|-------------|---------|----------|-------|--------|-------|-------|-----------------|---------|--------|
| Corpus Callosum | 0.22            |              |                |               |               |             |         |          |       |        |       |       |                 |         |        |
| Frontal Lobe    | 0.27            | 0.04         |                |               |               |             |         |          |       |        |       |       |                 |         |        |
| Occipital Lobe  | 0.39            | 0.20         | 0.21           |               |               |             |         |          |       |        |       |       |                 |         |        |
| Parietal Lobe   | 0.45            | 0.09         | 0.01           | 0.31          |               |             |         |          |       |        |       |       |                 |         |        |
| Temporal Lobe   | 0.40            | 0.05         | 0.03           | 0.26          | 0.06          |             |         |          |       |        |       |       |                 |         |        |
| Spinal Cord     | 0.23            | 0.04         | 0.07           | 0.22          | 0.11          | 0.12        |         |          |       |        |       |       |                 |         |        |
| Adipose         | 0.19            | 0.17         | 0.25           | 0.41          | 0.36          | 0.37        | 0.12    |          |       |        |       |       |                 |         |        |
| Appendix        | 0.10            | 0.18         | 0.27           | 0.37          | 0.39          | 0.40        | 0.16    | 0.03     |       |        |       |       |                 |         |        |
| Heart           | 0.25            | 0.11         | 0.15           | 0.09          | 0.22          | 0.16        | 0.10    | 0.14     | 0.13  |        |       |       |                 |         |        |
| Kidney          | 0.23            | 0.20         | 0.24           | 0.43          | 0.30          | 0.34        | 0.15    | 0.10     | 0.07  | 0.14   |       |       |                 |         |        |
| Liver           | 0.42            | 0.35         | 0.46           | 0.52          | 0.68          | 0.68        | 0.24    | 0.33     | 0.22  | 0.24   | 0.39  |       |                 |         |        |
| Ovary           | 0.41            | 0.31         | 0.40           | 0.13          | 0.56          | 0.52        | 0.22    | 0.39     | 0.27  | 0.07   | 0.39  | 0.38  |                 |         |        |
| Skeletal Muscle | 0.18            | 0.17         | 0.17           | 0.27          | 0.20          | 0.21        | 0.11    | 0.07     | 0.12  | 0.08   | 0.10  | 0.30  | 0.29            |         |        |
| Stomach         | 0.37            | 0.26         | 0.31           | 0.10          | 0.42          | 0.37        | 0.20    | 0.30     | 0.23  | 0.04   | 0.31  | 0.30  | 0.05            | 0.19    |        |
| Testis          | 0.76            | 0.60         | 0.68           | 0.37          | 0.92          | 0.89        | 0.46    | 0.68     | 0.55  | 0.23   | 0.65  | 0.73  | 0.24            | 0.51    | 0.22   |
