# Supplementary material for: Discovery of tissue-specific exons using comprehensive human exon microarrays
Source: PubMed Central journal article supplement (PMC1896007; doi:10.1186/gb-2007-8-4-r64), 2007-04-24

## Additional File 3 - Alternative Splicing in the Drugable Genome

### Alternative Splicing in the "Drugable Genome"

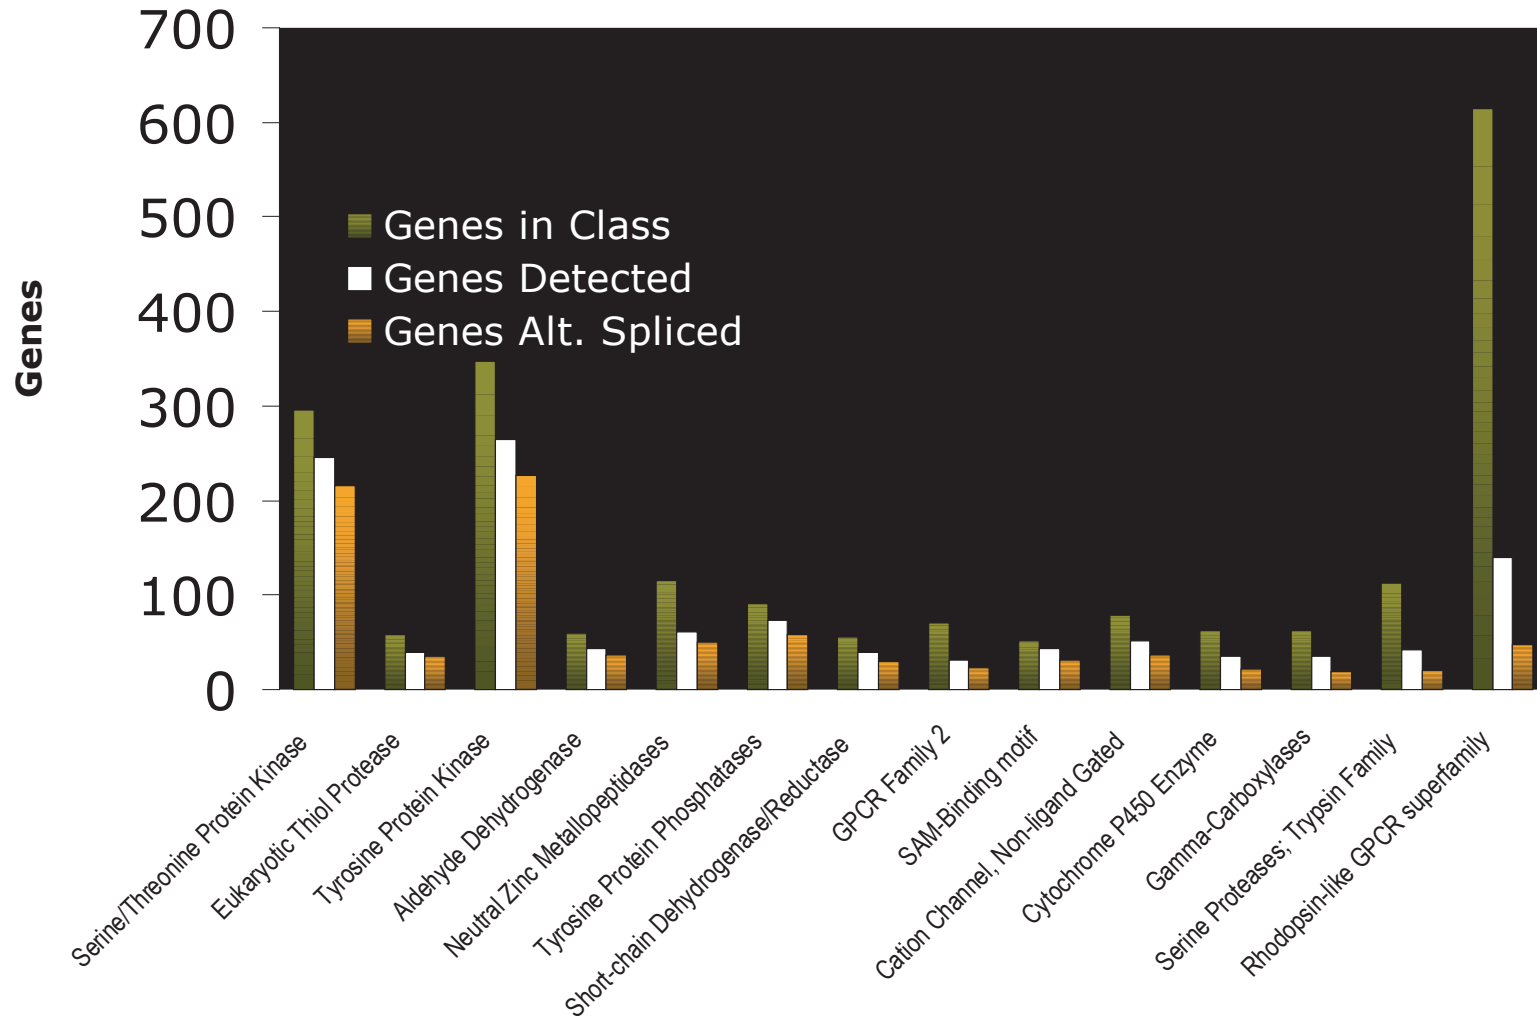

Supplement: gb-2007-8-4-r64-S3.pdf [file gb-2007-8-4-r64-S3.pdf]
