# Supplementary material for: Discovery of tissue-specific exons using comprehensive human exon microarrays
Source: PubMed Central journal article supplement (PMC1896007; doi:10.1186/gb-2007-8-4-r64), 2007-04-24

# Additional File 4

## Additional RT-PCR Validation of Predicted Brain-Enriched Exons

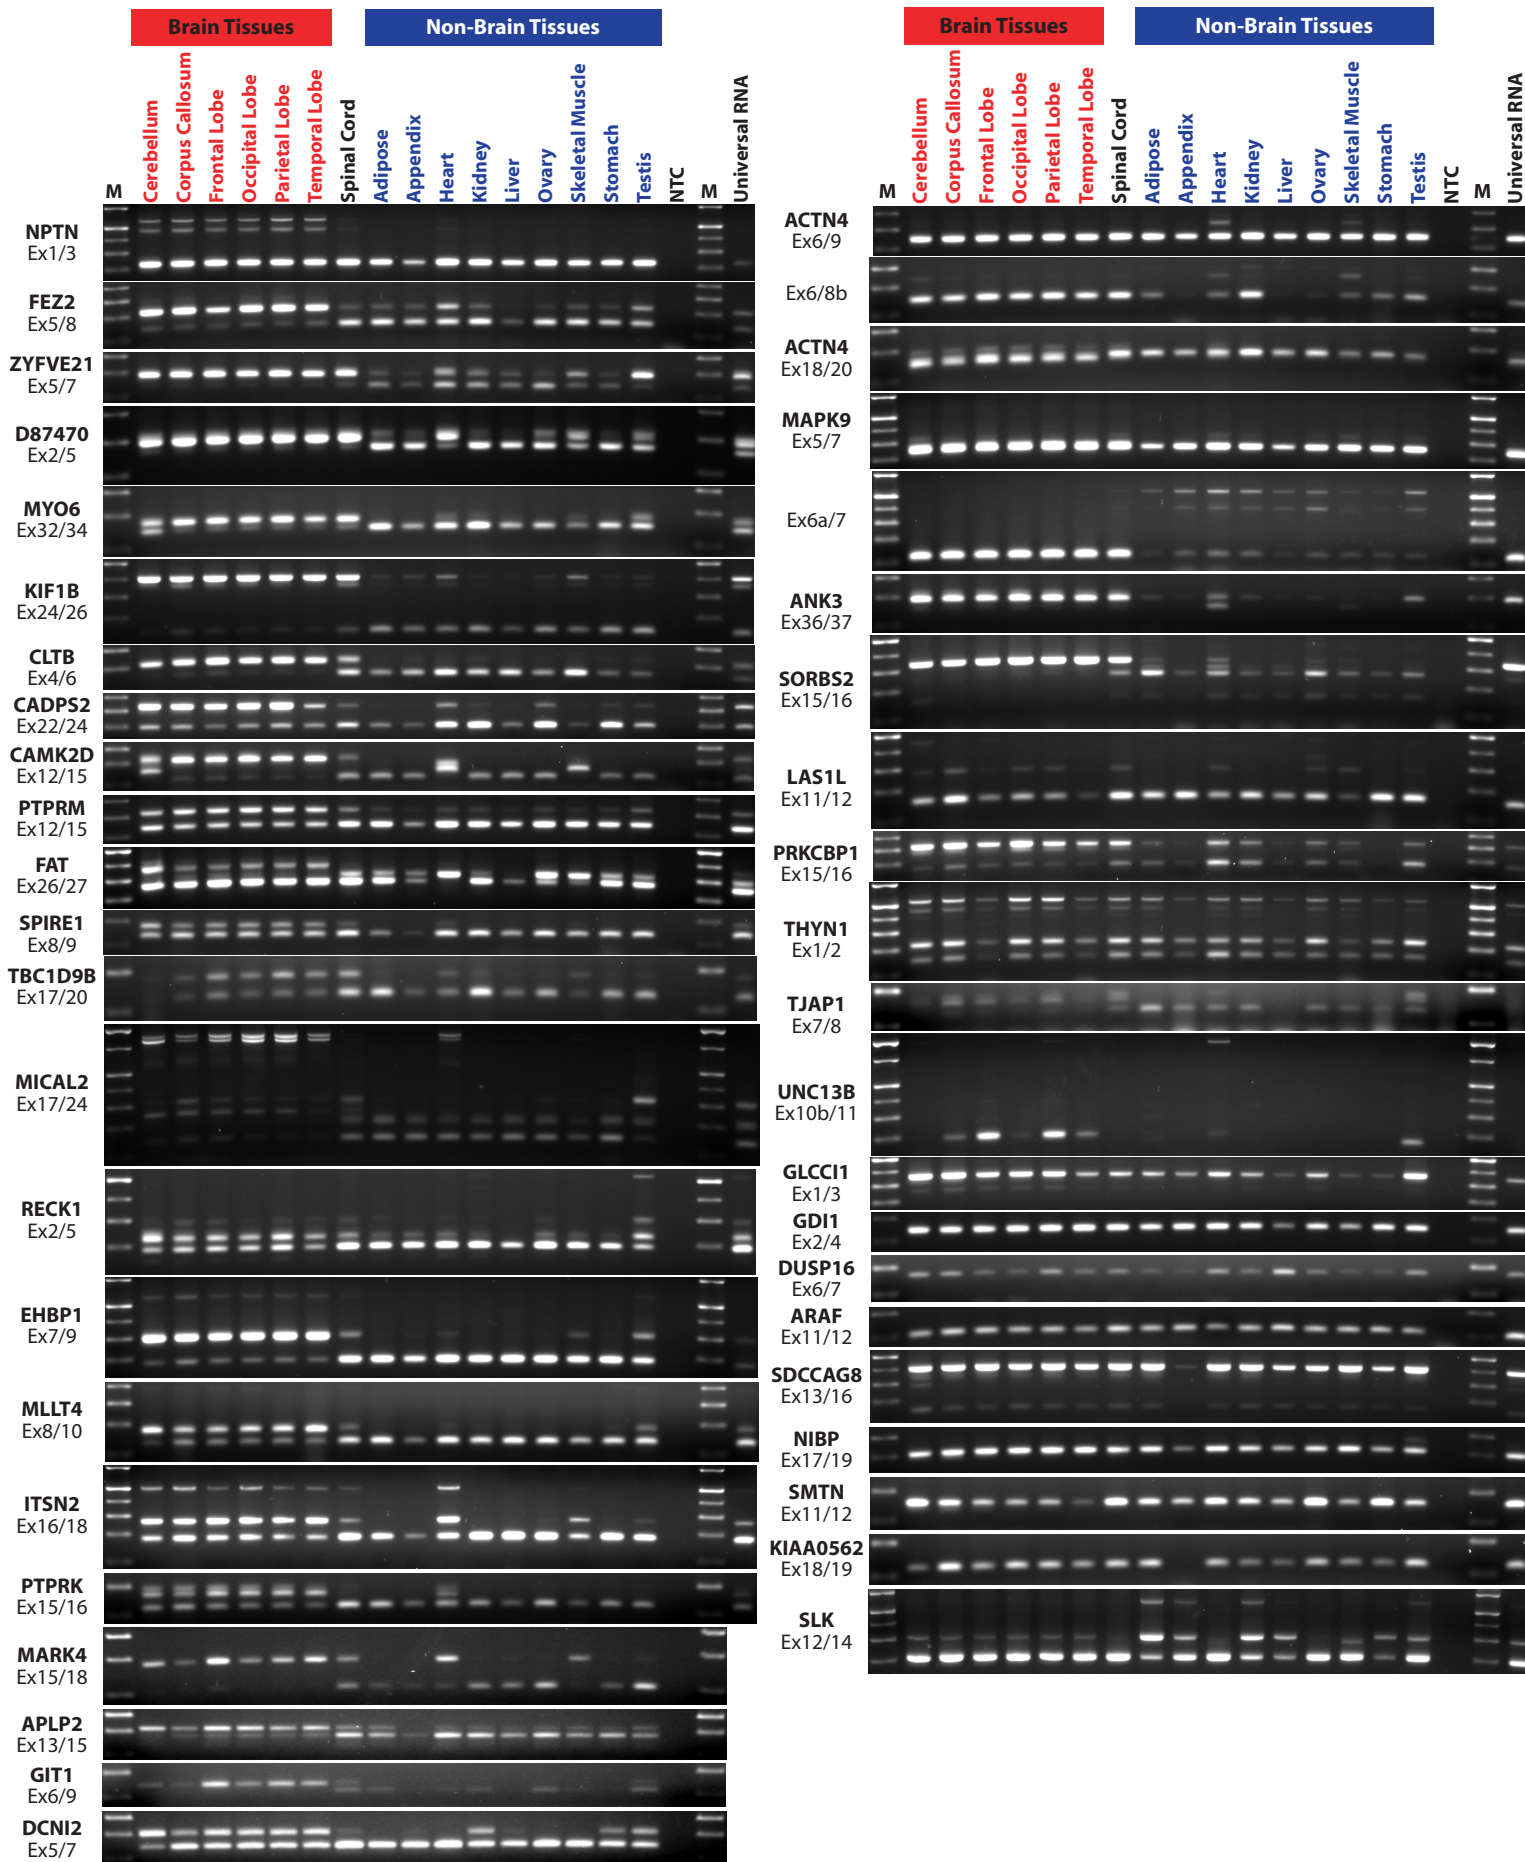

Supplement: gb-2007-8-4-r64-S4.pdf [file gb-2007-8-4-r64-S4.pdf]
