# Supplementary material for: Discovery of tissue-specific exons using comprehensive human exon microarrays
Source: PubMed Central journal article supplement (PMC1896007; doi:10.1186/gb-2007-8-4-r64), 2007-04-24
Supplement: gb-2007-8-4-r64-S5.pdf [file gb-2007-8-4-r64-S5.pdf]

# Additional File 5

## Correlation of Exon Cluster Probeset Intensities

**A** Distribution of Correlation of Signal Intensity Across Tissues for Probesets from the Same and Different Exon Clusters

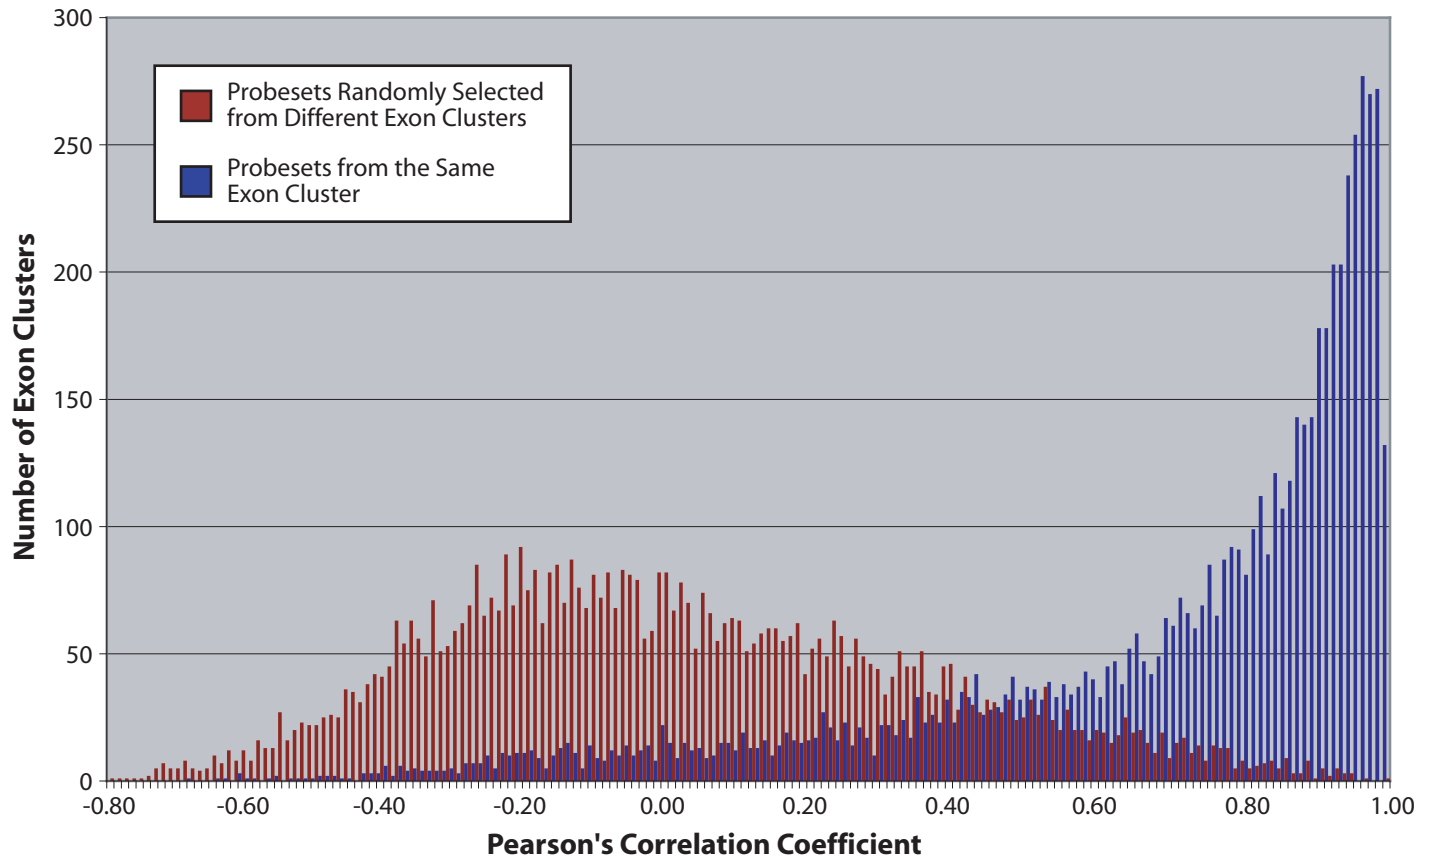

**B**

|                            | Same Exon Cluster |          | Random Exon Cluster |          |
|----------------------------|-------------------|----------|---------------------|----------|
| <b>MEDIAN CORRELATION</b>  | <b>0.83</b>       |          | <b>-0.01</b>        |          |
| <b>AVERAGE CORRELATION</b> | <b>0.701</b>      |          | <b>0.030</b>        |          |
| <b>CORR &lt;0</b>          | 341               | 5.39     | 3162                | 50.01    |
| <b>CORR &lt;.1</b>         | 469               | 7.41     | 3850                | 60.89    |
| <b>CORR &lt;.2</b>         | 616               | 9.74     | 4434                | 70.12    |
| <b>CORR &lt;.3</b>         | 803               | 12.69    | 4949                | 78.27    |
| <b>CORR &lt;.4</b>         | 1021              | 16.14    | 5374                | 84.99    |
| <b>CORR &lt;.5</b>         | 1344              | 21.25    | 5692                | 90.02    |
| <b>CORR &lt;.6</b>         | 1705              | 26.95    | 5940                | 93.94    |
| <b>CORR &lt;.7</b>         | 2156              | 34.08    | 6121                | 96.81    |
| <b>CORR &lt;.8</b>         | 2877              | 45.48    | 6240                | 98.69    |
| <b>CORR &lt;.9</b>         | 3978              | 62.88    | 6302                | 99.67    |
|                            | <b>Count</b>      | <b>%</b> | <b>Count</b>        | <b>%</b> |
