# Supplementary material for: Discovery of tissue-specific exons using comprehensive human exon microarrays
Source: PubMed Central journal article supplement (PMC1896007; doi:10.1186/gb-2007-8-4-r64), 2007-04-24

# Additional File 6

## Robustness Analysis of Gene-Level Estimation

**A**

$$\text{Median Percent Deviation} = \text{Median} \left[ \frac{(\text{altered gene-level estimate} - \text{original gene-level estimate})}{\text{original gene-level estimate}} \times 100 \right]$$

**B** Median Percent Deviation of Gene-Level Estimate when one Probeset is Removed

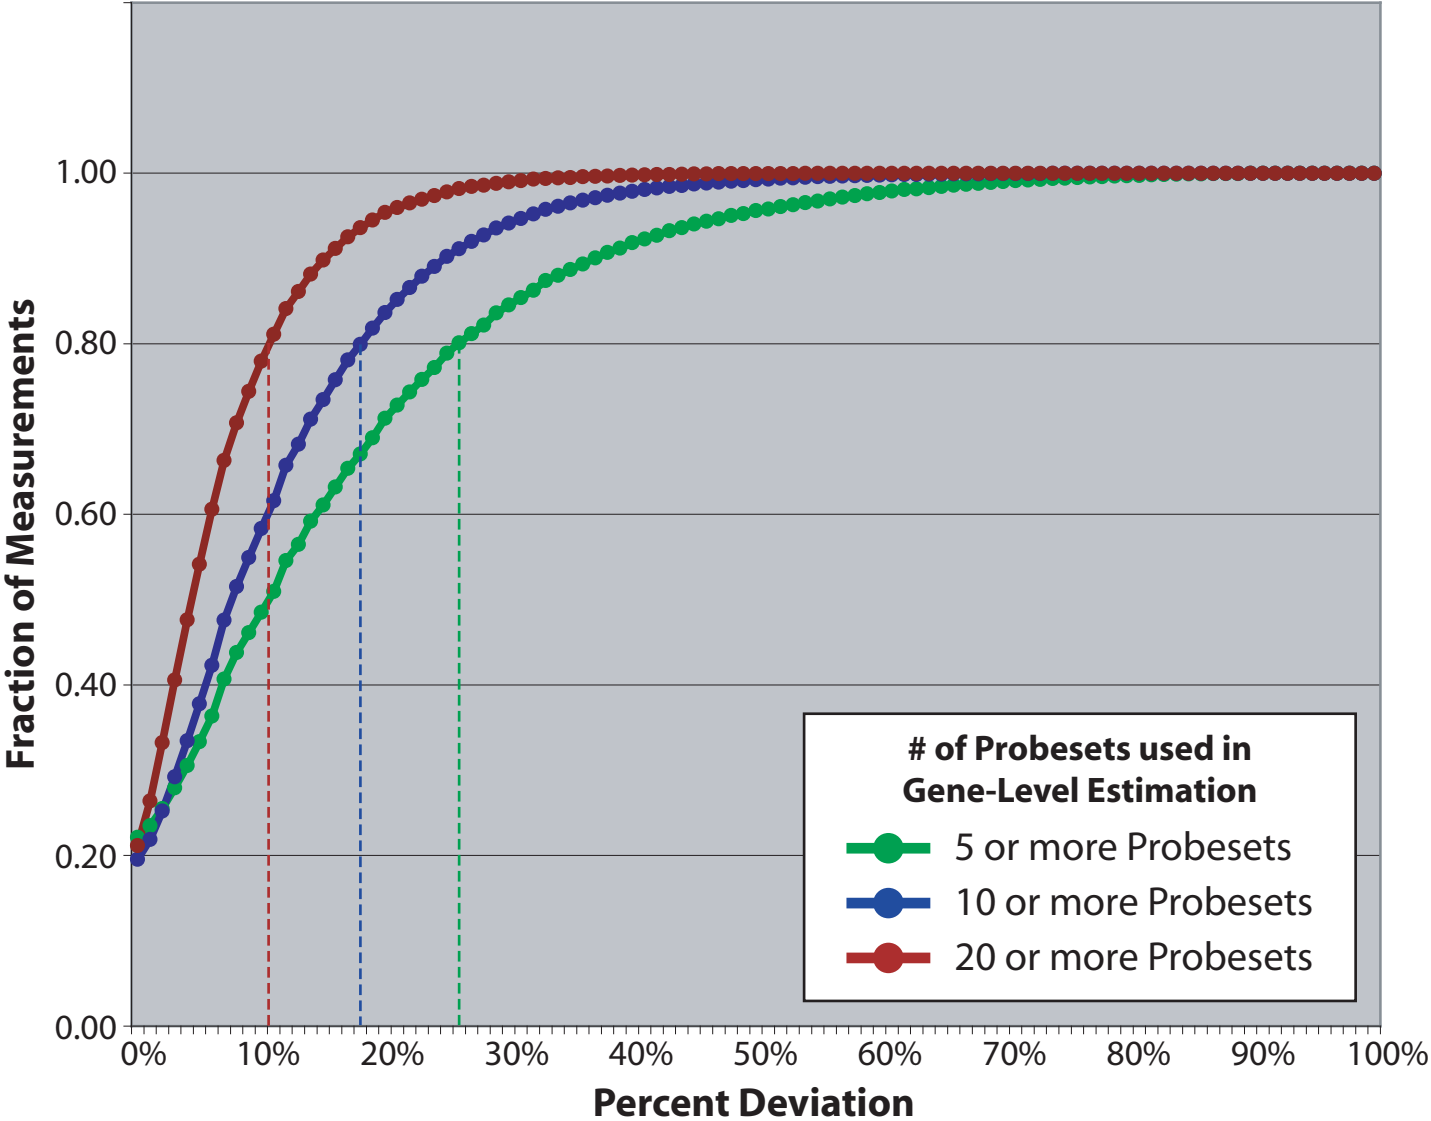

Supplement: gb-2007-8-4-r64-S6.pdf [file gb-2007-8-4-r64-S6.pdf]
