# Supplementary material for: Discovery of tissue-specific exons using comprehensive human exon microarrays
Source: PubMed Central journal article supplement (PMC1896007; doi:10.1186/gb-2007-8-4-r64), 2007-04-24
Supplement: gb-2007-8-4-r64-S7.pdf [file gb-2007-8-4-r64-S7.pdf]

| <b>Additional Table 1 - Chip Design Information</b> |                                |
|-----------------------------------------------------|--------------------------------|
| Number of Chips                                     | 4 (A,B,C,D)                    |
| Feature Size                                        | 8um                            |
| Genome Version                                      | NCBI Build 32, Nov 2002 (hg14) |
| Transcript Clusters                                 | 266,454                        |
| RefSeq / Ensembl Supported Transcript Clusters      | 19,221                         |
| Exon Clusters                                       | 1,032,926                      |
| Probe Selection Regions (PSRs)                      | 1,440,489                      |
| Probesets                                           | 1,495,766                      |
| Probe Pairs                                         | 4,895,858                      |
| Unique Probes                                       | 9,665,769                      |
| Exon Cluster Median Length                          | 149 nt                         |
| PSR Median Length                                   | 119 nt                         |
| PSR Minimum Length                                  | 17 nt                          |
| PSR Genome Coverage                                 | 286 MB                         |
|                                                     |                                |
| <b><u>Content Source</u></b>                        | <b><u>Probesets</u></b>        |
| EnsGene                                             | 342,843                        |
| Genscan (+SubOpt)                                   | 326,514                        |
| SLAM                                                | 176,759                        |
| TwinScan                                            | 191,589                        |
| cDNA / EST                                          | 502,019                        |
