# Supplementary material for: Discovery of tissue-specific exons using comprehensive human exon microarrays
Source: PubMed Central journal article supplement (PMC1896007; doi:10.1186/gb-2007-8-4-r64), 2007-04-24
Supplement: gb-2007-8-4-r64-S8.pdf [file gb-2007-8-4-r64-S8.pdf]

**Additional Table 2 - RNA Sample Information**

| <b>Tissue</b>   | <b>Sample Name</b>  | <b>ID</b> | <b>Lot #</b> | <b>Age</b> | <b>Gender</b> | <b>Group</b> |
|-----------------|---------------------|-----------|--------------|------------|---------------|--------------|
| Cerebellum      | Br_Cerebellum_1     | 01A       | A607140      | 26         | Male          | Brain        |
| Cerebellum      | Br_Cerebellum_2     | 01B       | A607139      | 22         | Male          | Brain        |
| Cerebellum      | Br_Cerebellum_3     | 01C       | A607138      | 28         | Male          | Brain        |
| Corpus Callosum | Br_CorpusCallosum_1 | 02A       | A608027      | 27         | Male          | Brain        |
| Corpus Callosum | Br_CorpusCallosum_2 | 02B       | A608028      | 26         | Male          | Brain        |
| Corpus Callosum | Br_CorpusCallosum_3 | 02C       | A608026      | 26         | Male          | Brain        |
| Frontal Lobe    | Br_FrontalLobe_1    | 03A       | A607143      | 28         | Male          | Brain        |
| Frontal Lobe    | Br_FrontalLobe_2    | 03B       | A607141      | 28         | Male          | Brain        |
| Frontal Lobe    | Br_FrontalLobe_3    | 03C       | A607142      | 29         | Male          | Brain        |
| Occipital Lobe  | Br_OccipitalLobe_1  | 04A       | A607146      | 22         | Male          | Brain        |
| Occipital Lobe  | Br_OccipitalLobe_2  | 04B       | A607145      | 27         | Male          | Brain        |
| Occipital Lobe  | Br_OccipitalLobe_3  | 04C       | A607144      | 28         | Male          | Brain        |
| Parietal Lobe   | Br_ParietalLobe_1   | 05A       | A607147      | 27         | Male          | Brain        |
| Parietal Lobe   | Br_ParietalLobe_2   | 05B       | A607148      | 21         | Male          | Brain        |
| Parietal Lobe   | Br_ParietalLobe_3   | 05C       | A607149      | 24         | Male          | Brain        |
| Temporal Lobe   | Br_TemporalLobe_1   | 06A       | A607150      | 26         | Male          | Brain        |
| Temporal Lobe   | Br_TemporalLobe_2   | 06B       | A607151      | 27         | Male          | Brain        |
| Temporal Lobe   | Br_TemporalLobe_3   | 06C       | A607152      | 33         | Male          | Brain        |
| Spinal Cord     | SpinaCord_1         | 07A       | A607196      | 44         | Male          | NA           |
| Spinal Cord     | SpinaCord_2         | 07B       | A607197      | 24         | Male          | NA           |
| Spinal Cord     | SpinaCord_3         | 07C       | A607198      | 25         | Male          | NA           |
| Adipose         | Adipose_1           | 08A       | A607134      | 24         | Male          | Non-Brain    |
| Adipose         | Adipose_2           | 08B       | A607133      | 34         | Male          | Non-Brain    |
| Adipose         | Adipose_3           | 08C       | A607132      | 36         | Male          | Non-Brain    |
| Appendix        | Appendix_1          | 09A       | A607137      | 27         | Male          | Non-Brain    |
| Appendix        | Appendix_2          | 09B       | A607136      | 21         | Male          | Non-Brain    |
| Appendix        | Appendix_3          | 09C       | A607135      | 44         | Male          | Non-Brain    |
| Heart           | Heart_1             | 10A       | A607163      | 29         | Male          | Non-Brain    |
| Heart           | Heart_2             | 10B       | A607164      | 44         | Male          | Non-Brain    |
| Heart           | Heart_3             | 10C       | A607165      | 27         | Male          | Non-Brain    |
| Kidney          | Kidney_1            | 11A       | A607168      | 26         | Male          | Non-Brain    |
| Kidney          | Kidney_2            | 11B       | A607167      | 26         | Male          | Non-Brain    |
| Kidney          | Kidney_3            | 11C       | A607166      | 46         | Male          | Non-Brain    |
| Liver           | Liver_1             | 12A       | A607169      | 23         | Male          | Non-Brain    |
| Liver           | Liver_2             | 12B       | A607170      | 26         | Male          | Non-Brain    |
| Liver           | Liver_3             | 12C       | A607171      | 30         | Male          | Non-Brain    |
| Ovary           | Ovary_1             | 13A       | A606270      | 39         | Female        | Non-Brain    |
| Ovary           | Ovary_2             | 13B       | A606272      | 45         | Female        | Non-Brain    |
| Ovary           | Ovary_3             | 13C       | A606282      | 41         | Female        | Non-Brain    |
| Skeletal Muscle | SkelMuscle_1        | 14A       | A607190      | 44         | Male          | Non-Brain    |
| Skeletal Muscle | SkelMuscle_2        | 14B       | A607191      | 26         | Male          | Non-Brain    |
| Skeletal Muscle | SkelMuscle_3        | 14C       | A607192      | 24         | Male          | Non-Brain    |
| Stomach         | Stomach_1           | 15A       | A607202      | 44         | Male          | Non-Brain    |
| Stomach         | Stomach_2           | 15B       | A607203      | 24         | Male          | Non-Brain    |
| Stomach         | Stomach_3           | 15C       | A607204      | 47         | Male          | Non-Brain    |
| Testis          | Testis_1            | 16A       | A607057      | 29         | Male          | Non-Brain    |
| Testis          | Testis_2            | 16B       | A607058      | 34         | Male          | Non-Brain    |
| Testis          | Testis_3            | 16C       | A607060      | 27         | Male          | Non-Brain    |
