# Supplementary material for: Discovery of tissue-specific exons using comprehensive human exon microarrays
Source: PubMed Central journal article supplement (PMC1896007; doi:10.1186/gb-2007-8-4-r64), 2007-04-24
Supplement: gb-2007-8-4-r64-S9.pdf [file gb-2007-8-4-r64-S9.pdf]

**Additional Table 3 - RT-PCR Primer Sequences**

| Gene           | Exons    | Probeset ID(s)                                  | Primer F               | Primer R               | Novel Exon(s) | GenBank Accession Number(s)                                                                         | Figure       | Comments                                                                                      |
|----------------|----------|-------------------------------------------------|------------------------|------------------------|---------------|-----------------------------------------------------------------------------------------------------|--------------|-----------------------------------------------------------------------------------------------|
| <i>PHLDB1</i>  | Ex23/25  | 104550938                                       | AGGCCATTGAGGAAGTGTAC   | CATCCATCCAGATACGCATG   |               |                                                                                                     | Fig. 4A      | Brain-enriched Exon                                                                           |
| <i>SLC9A7</i>  | Ex12/15  | 100381201,<br>100381206                         | CTTCACTGTCTGGATCATTG   | GTTTCTCTGGCAGAATCTG    |               |                                                                                                     | Fig. 4B      | Brain-depleted Exon                                                                           |
| <i>CLTA</i>    | Ex4/7    | 104676545,<br>96693464,<br>96693460             | TAGAAGAATGGTATGCAAGAC  | GGACGACTCGTCAATGTCA    |               |                                                                                                     | Fig. 5       | Double Cassette                                                                               |
| <i>RAB6IP2</i> | Ex18/20  | 95710993                                        | ACTACGAGGATGACCACTTC   | TTGTCAGGTGTCCAATGTAC   |               |                                                                                                     | Fig. 5       |                                                                                               |
| <i>TPD52</i>   | Ex4/8    | 96804991                                        | ATCCCAGGCTGGACAGAAG    | ATCACCACCAGCAGGCTTG    |               |                                                                                                     | Fig. 5       | Double Cassette                                                                               |
| <i>MYH10</i>   | Ex15/16  | 94245141                                        | TTGCACCAGTCATCAGACAG   | TTGCCATCAGCTTGGTGAG    | 1             | DQ925667                                                                                            | Fig. 5       | 1 Novel Brain-Enriched Exon                                                                   |
| <i>ATP11B</i>  | Ex28/31  | 98865728,<br>98865738,<br>98865742,<br>98865747 | CCTCATGGTTGTTACATGTC   | GACTACATCTTCCTATAACTC  | 1             | DQ925668                                                                                            | Fig. 5       | 1 Novel Brain Enriched Exon; Ex29 is also a cassette                                          |
| <i>EPB41L3</i> | Ex16/18  | 94015918                                        | AGACACTGCCGTAACGAATG   | ACCACCTTCTCAGTGTCTAAG  |               |                                                                                                     | Fig. 5       |                                                                                               |
| <i>MINK1</i>   | Ex17/19  | 83066970                                        | AATAAAGCCAAGCCCGACGA   | CCAGAGTCCGCTCTTTCAG    |               |                                                                                                     | Fig. 5       |                                                                                               |
| <i>WNK1</i>    | Ex26/27  | 95712169                                        | CAGTGACAACCTCTATTTCAG  | GTGCAAGTCATCTGTGAATG   | 2             | DQ925669                                                                                            | Fig. 6       | 2 Novel Brain-Enriched Exons (one of which also has an alt 5'ss)                              |
| <i>WNK1</i>    | Ex26/26b | 95712169                                        | CAGTGACAACCTCTATTTCAG  | CTGGTTGCAAGGACAGACT    |               | DQ925670,<br>DQ925671,<br>DQ925672                                                                  | Fig. 6       |                                                                                               |
| <i>OGDH</i>    | Ex3/5    | 97454232                                        | CAGTGCAGTCACTCATCAG    | TTGTCGAGGTCAGACTCATC   | 1             | DQ925673,<br>DQ925674                                                                               | Supp. Fig. 1 | 1 Novel Exon in addition to mutually exclusive Ex4a/4b                                        |
| <i>LPHN2</i>   | Ex15/18  | 100161769                                       | ACTATAAGAGCTATGGAACAG  | GTGAAGAGATATGCCATCAC   | 1             | DQ925675                                                                                            | Supp. Fig. 1 | 1 Novel Brain-Enriched Exon                                                                   |
| <i>DYM</i>     | Ex12/14  | 93975279                                        | CCATTCAATACAACATGACTAG | AACTCAGCGAACCTCTCAAG   | 1             | DQ925676                                                                                            | Supp. Fig. 1 | 1 Novel Brain-Enriched Exon                                                                   |
| <i>RAPGEF1</i> | Ex11/13  | 96442338                                        | ATGGAGGTATACGGCTTCAG   | AGCCGACTCCAGAGCATCT    | 4             | DQ925677,<br>DQ925678,<br>DQ925679,<br>DQ925680,<br>DQ925681,<br>DQ925682,<br>DQ925683,<br>DQ925684 | Supp. Fig. 1 | 3 Novel Brain-Enriched Exons (one of which also has an alt 3'ss); Novel Exon 4 found in Ovary |
| <i>PLEKHA6</i> | Ex9/11   | 105717857                                       | CCGTGCCCGCATTACTC      | CACCTTGTCTCTGCTCACACA  | 3             | DQ925685,<br>DQ925686,<br>DQ925687,<br>DQ925688,<br>DQ925689,<br>DQ925690,<br>DQ925691              | Supp. Fig. 1 | 3 Novel Exons                                                                                 |
| <i>ANK2</i>    | Ex47/49  | 98509599                                        | GCCACAGGAACCTGTCAAC    | TTTCCATGCTGGTCCCTTCAC  | 1             | DQ925692,<br>DQ925693                                                                               | Supp. Fig. 1 | 1 Novel Muscle-Enriched Exon                                                                  |
| <i>FAT</i>     | Ex26/27  | 98278505                                        | CTTTCCAAGAAGCCTCTAGAG  | GTAGCCTCCAGGGTAATAGT   | 1             | EF139845                                                                                            | Supp. Fig. 4 | 1 Novel Brain-Enriched Exon                                                                   |
| <i>CAMK2D</i>  | Ex12/15  | 98337652,<br>98337647                           | ACAACATATGCTGGTACAAG   | TTCACATCTTCACTCCCAATTG |               | EF139846                                                                                            | Supp. Fig. 4 | Novel arrangement of annotated exons                                                          |
| <i>PTPRK</i>   | Ex15/16  | 97560338                                        | CACTCTGCATGCAGAAGATC   | GGTAGCGAGGTACGTCTAG    |               | EF139847                                                                                            | Supp. Fig. 4 | Novel arrangement of annotated exons                                                          |
| <i>RECK</i>    | Ex2/5    | 96694017,<br>96694012                           | TAACCAAATGTGCCGTGATG   | CCAGTTCACAGCAGCCTAAG   |               | EF139848                                                                                            | Supp. Fig. 4 | Novel arrangement of annotated exons                                                          |
| <i>UNC13B</i>  | Ex10b/11 | 104676985                                       | ACCTCAACAAGTGATCAAC    | CCTTCCGGGAGCCACTGAG    |               | EF139849                                                                                            | Supp. Fig. 4 | Novel arrangement of annotated exons                                                          |
| <i>ANK3</i>    | Ex36/37  | 96180441,<br>96180431                           | CAGATAGACGACAGAGCTTC   | GGCCAGGCACTGTAATCG     |               | EF139850                                                                                            | Supp. Fig. 4 | Novel 5' ss                                                                                   |
| <i>ANK3</i>    | Ex36/38  | 96180441,<br>96180431                           | CAGATAGACGACAGAGCTTC   | CTATTGCCATCTGTATATCTG  |               | EF139851                                                                                            | Supp. Fig. 4 | Novel 5' ss                                                                                   |
| <i>SORBS2</i>  | Ex15/16  | 98280250                                        | TGGACCTCCAGGATCAAGC    | CAGTCGTCGTTTAGGAGATC   |               | EF139852                                                                                            | Supp. Fig. 4 | Novel 3' ss                                                                                   |
| <i>SLK</i>     | Ex12/14  | 96295717                                        | AGAGCACAAATCGCTTGC     | GCACCTCTCTCAATATTAGC   | 1             | EF139853                                                                                            | Supp. Fig. 4 | 1 Novel Exon Enriched in Non-Brain Tissues                                                    |
