# Supplementary material for: Discovery of tissue-specific exons using comprehensive human exon microarrays
Source: PubMed Central journal article supplement (PMC1896007; doi:10.1186/gb-2007-8-4-r64), 2007-04-24
Supplement: gb-2007-8-4-r64-S10.pdf [file gb-2007-8-4-r64-S10.pdf]

**Additional Table 4 - Additional RT-PCR Primer Sequences**

| Gene     | Exons    | Probeset ID(s)          | Primer F              | Primer R               | Splicing Index | P-Value Rank | SI Magnitude Rank | VALIDATED? |
|----------|----------|-------------------------|-----------------------|------------------------|----------------|--------------|-------------------|------------|
| GLCC1    | Ex1/3    | 97494957                | GAGCAGCTCACCTGAGAGA   | TCCTTACTGTGACACTAC     | 2              | 596          |                   |            |
| TBC1D9B  | Ex17/20  | 97891655                | CAAGGTGCTCTACAAGCTAC  | TTGCTCTTCTGTGGTAGTG    | 6              | 303          |                   |            |
| ANK3     | Ex36/37  | 96180441,<br>96180431   | CAGATAGACGACAGAGCTTC  | GGCCCAGGCACTGTAATCG    | 7              | 400          |                   |            |
| NPTN     | Ex1/3    | 94749260                | TTCTGCTAGGGAGGATGTC   | TCTTGTCCAGTAGCTGTATG   | 8              | 628          |                   |            |
| FEZ2     | Ex5/8    | 99307244                | TGGGAAGAATGAGAGAAGTCA | TTTCACTGTCTCCTTCATG    | 10             | 48           |                   |            |
| TPD52L2  | Ex5/8    | 93583452                | GCAGGACAGAAGACTTCAG   | TCGGTCTCAAACGACTTG     | 16             | 49           |                   |            |
| ACTN4    | Ex6/8b   | 93861390                | ACAGACCAGAGCTGATTGAG  | TTCTCATCTGGCCTCAGAG    | 21             | 233          |                   |            |
| ZYFVE21  | Ex5/7    | 95078447                | ACATTTCCACCGTGCAGATC  | CCACCACCTGTCAGCTTCAG   | 22             | 323          |                   |            |
| D87470   | Ex2/5    | 95787339                | CCTAAGAACATGGCCTACAC  | GCCACAGGAAGACGAGTTC    | 24             | 312          |                   |            |
| MICAL2   | Ex17/24  | 96051659,<br>96052696   | GCTGCTGGCCAAGTTTGAG   | TCAGCCGTTCATCACGTAC    | 25             | 144          |                   |            |
| MYO6     | Ex32/34  | 97796794                | TGCTCCAAAGTCTGTTACTG  | TACTCTGAGGGTCTTTGTAC   | 28             | 313          |                   |            |
| TJAP1    | Ex7/8    | 97821142,<br>97821137   | AGGAGTTGGAGGACAAGCT   | GCTCTTCCAGCTTGTTGATG   | 29             | 292          |                   |            |
| KIF1B    | Ex24/26  | 100266293               | AAAGCGAAACCACTGTGACT  | CACCTTCTCACTGACGATG    | 31             | 187          |                   |            |
| LAS1L    | Ex11b/12 | 105353418,<br>100363607 | TGCTGGTCTCGGAGAAGTC   |                        | 33             | 364          |                   |            |
| GDI1     | Ex2/4    | 105358575               | TCTGTGAACGGGAAGAAGGT  | CACCTTGAAGTCCAGGTAG    | 34             | 1100         |                   |            |
| CLTB     | Ex4/6    | 105557570               | GCCAGAGTGAACAAGTAGAG  | ACACATCTTTGCACTGCTTG   | 36             | 72           |                   |            |
| DUSP16   | Ex6/7    | 95521258                | TCGCTATCGCCTACATCATG  | TTTGCTCTTTGGCCTGATG    | 45             | 484          |                   |            |
| ARAF     | Ex11/12  | 100506032               | CGACACACGCTTCGACATG   | ACTTGAGATCTCGGTGGATG   | 47             | 432          |                   |            |
| RECK1    | Ex2/5    | 96694017,<br>96694012   | TAACCAATGTGCCGTGATG   | CCAGTTCACAGCAGCCTAAG   | 58             | 791          |                   |            |
| THYN1    | Ex1/2    | 95715606                | GCAGTCGAGTCTGCAGAGT   | AATGCCTCACCTGAGTTCTC   | 60             | 799          |                   |            |
| MAPK9    | Ex6a/7   | 104808736               | TGGTCTCCATAAAGTCTCTG  | TTCTCACAGTTGGCTGAAG    | 62             | 268          |                   |            |
| CADPS2   | Ex22/24  | 97162001                | TCCGCTATGTGGATCTCATG  | GTTTAAGTCTTTGCTCTAAGTG | 63             | 130          |                   |            |
| Y652     | Ex11/14  | 96016281                | GTCTGTAGAAGACTCTCAAG  | GTCAGCCTGGGTACCATG     | 68             | 33           |                   |            |
| PRKCBP1  | Ex15/16  | 103802407               | GCTTTTACCGAAGGAGACTG  | GGACACAAGGGTGTCTCATG   | 69             | 661          |                   |            |
| CAMK2D   | Ex12/15  | 98337652,<br>98337647   | ACAACATATGCTGGCTACAAG | TTCACATCTTCATCCTCAATTG | 70             | 203          |                   |            |
| SDCCAG8  | Ex13/16  | 105282261               | CGAATCTGAGCACCAACTG   | TGCTTCATCGTCTCATGTAC   | 75             | 722          |                   |            |
| SORBS2   | Ex15/16  | 98280250                | TGGACCTCCCAGGATCAAGC  | CAGTCGTGTTTAGGAGATC    | 340            | 8            |                   |            |
| ACTN4    | Ex18/20  | 93860469                | CATCAGCCAGGAGCAGATG   | CTCATGATGCGGTTGAACTC   | 151            | 13           |                   |            |
| UNC13B   | Ex10b/11 | 104676985               | ACCTCAACAAGTGCATCAAC  | CCTTCCGGGAGCCACTGAG    | 679            | 14           |                   |            |
| ENBP1    | Ex7/9    | 99566362                | TATGAAGCAGGCTGCATTG   | CAGCATCAGGATCATCAAATG  | 107            | 17           |                   |            |
| TPD52L2  | Ex5/8    | 103811692               | GCAGGACAGAAGACTTCAG   | TCGGTCTCAAACGACTTG     | 126            | 32           |                   |            |
| MLL4     | Ex8/10   | 97705870                | AAACACTTGAAGGCAAGAC   | TGGCTTATCTTAGAGTCAG    | 279            | 34           |                   |            |
| PTPRM    | Ex12/15  | 94095691                | TTTCCAAGCTGCTAGTAGAG  | CTGTCCGGTGTCTCATG      | 78             | 35           |                   |            |
| NIBP     | Ex17/19  | 96746277                | CGACTACAGCCACGTGAAG   | TCGGTGGAGTTGAAGACATC   | 283            | 43           |                   |            |
| FAT      | Ex26/27  | 98278505                | CCTGTCTGAAGTGCAGTCT   | GGCATCCAATCTGATGTATC   | 517            | 44           |                   |            |
| SMTN     | Ex11/12  | 93390005                | GGCAGTGTCACTCATGTC    | TTCTGGTGTCTTTGTTCACTC  | 480            | 50           |                   |            |
| ITSN2    | Ex16/18  | 99323041                | AACTGCATCTAAGCTGTCAG  | CTTGCAGCCTCATCTTCTAG   | 378            | 54           |                   |            |
| BIN1     | Ex6/8    | 105077962               | AAGCTGGTGGACTACGACA   | CTCCTGCAGATCCACATTC    | 430            | 58           |                   |            |
| APLP2    | Ex13/15  | 104546949               | GTGCAGATATGGACCAGTTC  | TCTCTTCGGCACCGATCAG    | 150            | 871          |                   |            |
| RBM9     | Ex9/13   | 93318444                | CGGACAGTATATGGTGCAGT  | CAGGCTGTGCATATCTGTAG   | 206            | 783          |                   |            |
| EPB41L3  | Ex15/17  | 94016008                | AGACACTGCCGTAAACGAATG | ACCACCTTCTCAGTGCTAAG   | 226            | 157          |                   |            |
| PTPRK    | Ex15/16  | 97560338                | CACCTGTGCATCAGAAGATC  | GGTAGCAGGTCAGTCTAG     | 227            | 538          |                   |            |
| GIT1     | Ex6/9    | 94213279                | GCCAATATGAGTCACTGAC   | TTGGCCAATTCGGATAAGTC   | 229            | 141          |                   |            |
| STAU     | Ex3/5    | 93520304                | CTTAACCTCTCAGAAGTGAAC | GACTGCATCCGAGAGTAAG    | 242            | 762          |                   |            |
| KIAA0562 | Ex18/19  | 99950716                | TCTCATGCTGACAAGATGTG  | CTCACTGCAACGGTAACAC    | 249            | 396          |                   |            |
| EPB41L1  | Ex12/14  | 93626410                | GTCAGCGAGAACCATGATG   | CTTCAGCAAGACATCTTCTG   | 337            | 1066         |                   |            |
| SPIRE1   | Ex8/9    | 94005738                | CCAGAGGAGATTAGACGTAG  | GCACCTGTGTGAGGTAAGT    | 345            | 118          |                   |            |
| HM13     | Ex11/13  | 93637662                | GGCCAAGGAGAAGTGACA    | GATGCTGATGCCCTGTTC     | 611            | 428          |                   |            |
| EPB41L3  | Ex11/14  | 94015893                | CCTTACTTTGAACGCTCATC  | CCGTGGCCTCATGTCAG      | 703            | 548          |                   |            |
| EPB41L3  | Ex14/16  | 94015918                | GACAGTGAGCCGACCGAC    | TTACGGCAGTGTCTGTTGAG   | 753            | 250          |                   |            |
| MARK4    | Ex15/18  | 93843376                | AACCTCTTACCAAGCTGAC   | GTTTGATCCCAAGGTAGATG   | 860            | 343          |                   |            |
| APLP2    | Ex6/8    | 104546909               | TGAGGAGAATCTACTGAAC   | GAGCATGCTCATTATCATCTG  | 929            | 1046         |                   |            |
| DCN12    | Ex5/7    | 105158206               | TGTGAGCACTCCAAGTGAAG  | AGTTTCCTTTGTATACGTGAC  |                |              |                   |            |
