# Supplementary material for: Discovery of tissue-specific exons using comprehensive human exon microarrays
Source: PubMed Central journal article supplement (PMC1896007; doi:10.1186/gb-2007-8-4-r64), 2007-04-24
Supplement: gb-2007-8-4-r64-S11.pdf [file gb-2007-8-4-r64-S11.pdf]

**Additional Table 5 - Normalization Control Genes**

| GENE       | TRANSCRIPT_CLUSTER        | DESCRIPTION                                                                       |
|------------|---------------------------|-----------------------------------------------------------------------------------|
| TARDBP     | 1_10782225-10795095       | TAR DNA binding protein                                                           |
| ILF2       | 1_150851307-150860271_RC  | interleukin enhancer binding factor 2                                             |
| SLC39A1    | 1_151148370-151231385_RC  | Zinc transporter ZIP1                                                             |
| ARF1       | 1_225244992-225261541     | ADP-ribosylation factor 1                                                         |
| GUK1       | 1_225302622-225311287     | Guanylate kinase                                                                  |
| RPL11      | 1_23487769-23492390       | 60S ribosomal protein L11                                                         |
| KHDRBS1    | 1_31981955-32028923       | KH domain containing, RNA binding, signal transduction associated 1               |
| PSMB2      | 1_35496402-35534805_RC    | Proteasome subunit beta type 2                                                    |
| ATP6V0B    | 1_43853905-43857260       | Vacuolar ATP synthase 21 kDa proteolipid subunit                                  |
| PARK7      | 1_7731339-7754885         | DJ-1 protein (Oncogene DJ1)                                                       |
| ALS2CR17   | 2_204175240-204293644     | neurobeachin-like 1                                                               |
| C2orf24    | 2_220239158-220245271_RC  | hypothetical protein LOC27013                                                     |
| NEDD5      | 2_242575525-242614182     | Septin 2 (NEDD5 protein homolog)                                                  |
| RPS7       | 2_3187378-3193019         | 40S ribosomal protein S7                                                          |
| RPS27A     | 2_55434358-55437279       | Ubiquitin                                                                         |
| STARD7     | 2_96335353-96359319_RC    | StAR-related lipid transfer protein 7                                             |
| U520_HUMAN | 2_96424830-96456040_RC    | U5 small nuclear ribonucleoprotein 200 kDa helicase                               |
| RPL34      | 4_110000543-110010388     | 60S ribosomal protein L34                                                         |
| RPL9       | 4_39352927-39357717_RC    | ribosomal protein L9                                                              |
| HNRPD      | 4_83732862-83753544_RC    | Heterogeneous nuclear ribonucleoprotein D0                                        |
| HINT1      | 5_130571198-130577252_RC  | Histidine triad nucleotide-binding protein 1 (Adenosine 5'- monophosphoramidase)  |
| IK         | 5_140055884-140070565     | Red protein (RER protein)                                                         |
| ATP6V0E    | 5_172391686-172442823     | Vacuolar ATP synthase subunit H                                                   |
| CANX       | 5_179235655-179267584     | Calnexin precursor                                                                |
| SNX3       | 6_108559405-108628033_RC  | Sorting nexin 3 (SDP3 protein)                                                    |
| CBX3       | 7_25983371-25999238       | Chromobox protein homolog 3 (Heterochromatin protein 1 homolog gamma)             |
| FNTA       | 8_42928844-42958291       | Protein farnesyltransferase/geranylgeranyltransferase type I alpha subunit        |
| RPL30      | 8_99010528-99014356_RC    | 60S ribosomal protein L30                                                         |
| RPS6       | 9_19366254-19370235_RC    | ribosomal protein S6                                                              |
| HNRPK      | 9_82040211-82052638_RC    | Heterogeneous nuclear ribonucleoprotein K (hnRNP K)                               |
| SMNDC1     | 10_111717385-111729284_RC | Survival of motor neuron-related splicing factor 30                               |
| GDI2       | 10_5811192-5859379_RC     | Rab GDP dissociation inhibitor beta                                               |
| EIF4G2     | 11_10782910-10794780_RC   | Eukaryotic translation initiation factor 4 gamma 2                                |
| ZNF259     | 11_116186928-116196400_RC | Zinc-finger protein ZPR1                                                          |
| C11orf58   | 11_16724503-16741882      | small acidic protein                                                              |
| SYVN1      | 11_64643358-64677363_RC   | synoviolin 1 isoform b                                                            |
| CFL1       | 11_65397642-65401164_RC   | Cofilin, non-muscle isoform                                                       |
| SART1      | 11_65504560-65522967      | squamous cell carcinoma antigen recognized by T cells 1                           |
| TAF10      | 11_6596382-6597754_RC     | Transcription initiation factor TFIID subunit 10                                  |
| EIF3S5     | 11_7972746-7982027        | Eukaryotic translation initiation factor 3 subunit 5                              |
| SART3      | 12_107418824-107457404_RC | squamous cell carcinoma antigen recognized by T cells 3                           |
| SFRS9      | 12_119273523-119319511_RC | Splicing factor, arginine/serine-rich 9                                           |
| ANAPC5     | 12_120116781-120202156_RC | Anaphase promoting complex subunit 5 (APC5)                                       |
| ARF3       | 12_47616259-47637577_RC   | ADP-ribosylation factor 3                                                         |
| SLC25A3    | 12_97489871-97498246      | Phosphate carrier protein, mitochondrial precursor                                |
| DAD1       | 14_21023935-21048257_RC   | Defender against cell death 1 (DAD-1)                                             |
| ERH        | 14_67836886-67855062_RC   | Enhancer of rudimentary homolog                                                   |
| YY1        | 14_98695143-98734845      | Transcriptional repressor protein YY1 (Yin and yang 1)                            |
| RNPS1      | 16_2208773-2258038_RC     | RNA-binding protein S1, serine-rich domain                                        |
| TCEB2      | 16_2821336-2827218_RC     | Transcription elongation factor B polypeptide 2                                   |
| KARS       | 16_75441183-75461130_RC   | Lysyl-tRNA synthetase                                                             |
| COX4I1     | 16_85614675-85622087      | Cytochrome c oxidase subunit IV isoform 1, mitochondrial precursor                |
| PRPF8      | 17_1760515-1794691_RC     | U5 snRNP-specific protein                                                         |
| USP22      | 17_21064939-21109102_RC   | Ubiquitin carboxyl-terminal hydrolase 22                                          |
| RPL27      | 17_41523611-41528502      | 60S ribosomal protein L27                                                         |
| MYST2      | 17_48340702-48381096      | PREDICTED: similar to MYST histone acetyltransferase 2; histone acetyltransferase |
| SPAG7      | 17_5029164-5071674_RC     | sperm associated antigen 7                                                        |
| DDX5       | 17_63045835-63052508_RC   | Probable RNA-dependent helicase p68                                               |
| DULLARD    | 17_7347723-7355828_RC     | dullard homolog                                                                   |
| RPL17      | 18_45267716-45270838_RC   | ribosomal protein L17                                                             |
| NARS       | 18_53416875-53438009_RC   | Asparaginyl-tRNA synthetase, cytoplasmic                                          |
| C19orf50   | 19_18529604-18541188      | hypothetical protein LOC79036                                                     |
| OAZ1       | 19_2220520-2224487        | Ornithine decarboxylase antizyme                                                  |
| EEF2       | 19_3927054-3936451_RC     | Elongation factor 2 (EF-2)                                                        |
| CAPNS1     | 19_41322757-41333095      | Calpain small subunit 1 (CSS1)                                                    |
| ZNF146     | 19_41411488-41421506      | Zinc finger protein OZF                                                           |
| RPL28      | 19_60589112-60628852      | 60S ribosomal protein L28                                                         |
| HNRPM      | 19_8415651-8478786        | Heterogeneous nuclear ribonucleoprotein M (hnRNP M)                               |
| C22orf28   | 22_31108123-31132787_RC   | hypothetical protein LOC51493                                                     |
| EIF3S7     | 22_35149936-35168522_RC   | Eukaryotic translation initiation factor 3 subunit 7                              |
| NONO       | X_69370258-69387815       | 54 kDa nuclear RNA- and DNA-binding protein                                       |
